# Supplementary material
Source: MDPI journal article supplement (https://www.mdpi.com/2076-0760/10/2/63)
Supplement: s1 [file s1]

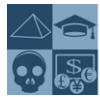

Table S4. Data extraction summary table.

| Author,<br>date<br>(Type<br>of<br>review) | Number of<br>individual<br>publications<br>included in<br>the<br>umbrella<br>review | Continents<br>of<br>destination | Continents<br>of origin | Study<br>design | Sum of<br>the size<br>of the<br>included<br>samples<br>(range) | Review<br>aim | SRH<br>outcomes | Determinants /<br>PROGRESS-PLUS | Female<br>gender<br>(%) | Age<br>range<br>or<br>mean<br>years | Overall<br>results<br>of the<br>review | Overall<br>limitations<br>of the<br>study | Overall<br>recommendations<br>of the<br>study |
|-------------------------------------------|-------------------------------------------------------------------------------------|---------------------------------|-------------------------|-----------------|----------------------------------------------------------------|---------------|-----------------|---------------------------------|-------------------------|-------------------------------------|----------------------------------------|-------------------------------------------|-----------------------------------------------|
|                                           |                                                                                     |                                 |                         |                 |                                                                |               |                 |                                 |                         |                                     |                                        |                                           |                                               |
