# Supplementary material
Source: MDPI journal article supplement (https://www.mdpi.com/2076-0760/10/2/63)
Supplement: s1 [file s1]

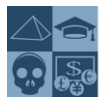

Table S2. Search strategy.

| Database | Search | Query                                                                                                                                                                                                                                                                                                                                                                                                                                                                                                                                                                                                                                                                                                                                                                                                                                                               |
|----------|--------|---------------------------------------------------------------------------------------------------------------------------------------------------------------------------------------------------------------------------------------------------------------------------------------------------------------------------------------------------------------------------------------------------------------------------------------------------------------------------------------------------------------------------------------------------------------------------------------------------------------------------------------------------------------------------------------------------------------------------------------------------------------------------------------------------------------------------------------------------------------------|
| Medline  | #1     | Acculturation [Mesh Major Topic] OR Acculturation[TIAB] OR Emigrants and Immigrants [Mesh Major Topic] OR Ethnic Groups [Mesh Major Topic] OR Undocumented Immigrants [Mesh Major Topic] OR enculturation[TIAB] OR ethnicity[TIAB] OR immigrant*[TIAB] OR migrant*[TIAB] = 171738                                                                                                                                                                                                                                                                                                                                                                                                                                                                                                                                                                                   |
|          | #2     | Family Planning Services [Mesh Major Topic] OR Maternal Health [Mesh Major Topic] OR Maternal Health Services [Mesh Major Topic] OR Postnatal Care [Mesh Major Topic] OR Prenatal Care [Mesh Major Topic] OR Reproductive Health [Mesh Major Topic] OR Reproductive Health Services [Mesh Major Topic] OR Sexual Health [Mesh Major Topic] OR "Parturition" [Mesh Major Topic] OR "Pregnancy" [Mesh Major Topic] OR "Family Planning Services"[TIAB] OR "Maternal Health"[TIAB] OR "Maternal Health Services"[TIAB] OR "Postnatal Care"[TIAB] OR "Prenatal Care"[TIAB] OR "Reproductive Health"[TIAB] OR "Reproductive Health Services"[TIAB] OR "Sexual Health"[TIAB] OR Parturition[TIAB] OR Pregnancy[TIAB] OR births[TIAB] OR contraceptive behavio*[TIAB] OR fertility behavio*[TIAB] OR "intimate relationship"[TIAB] OR reproductive behavio*[TIAB] = 544649 |
|          | #3     | Reproductive Rights [Mesh Major Topic] OR "Reproductive Rights"[TIAB] OR "Disrespect and abuse in childbirth"[TIAB] OR "Mistreatment in childbirth"[TIAB] OR "Obstetric violence"[TIAB] OR "respectful maternity care"[TIAB] = 1364                                                                                                                                                                                                                                                                                                                                                                                                                                                                                                                                                                                                                                 |
|          | #4     | Abortion [Mesh Major Topic] OR Contraception [Mesh Major Topic] OR Infertility [Mesh Major Topic] OR Pregnancy Behavior [Mesh Major Topic] OR Sexual Behavior [Mesh Major Topic] OR Sexual Dysfunctions, Psychological [Mesh Major Topic] OR Abortion[TIAB] OR Contraception[TIAB] OR Infertility[TIAB] OR Pregnancy Behavio*[TIAB] OR Sexual Behavio*[TIAB] OR Sexual Dysfunction*[TIAB] = 304033                                                                                                                                                                                                                                                                                                                                                                                                                                                                  |
|          | #5     | ((((systematic review[ti] OR systematic literature review[ti] OR systematic scoping review[ti] OR systematic narrative review[ti] OR systematic qualitative review[ti] OR systematic evidence review[ti] OR systematic quantitative review[ti] OR systematic meta-review[ti] OR systematic critical review[ti] OR systematic mixed studies review[ti] OR systematic mapping review[ti] OR systematic cochrane review[ti] OR systematic search and review[ti] OR systematic integrative review[ti]) NOT comment[pt] NOT (protocol[ti] OR protocols[ti])) NOT MEDLINE [subset]) OR (Cochrane Database Syst Rev[ta] AND review[pt]) OR systematic review[pt] = 134937                                                                                                                                                                                                  |
|          | #6     | (#2 OR #3 OR #4) = 752957                                                                                                                                                                                                                                                                                                                                                                                                                                                                                                                                                                                                                                                                                                                                                                                                                                           |
|          | #7     | #1 AND #5 AND #6 = 147                                                                                                                                                                                                                                                                                                                                                                                                                                                                                                                                                                                                                                                                                                                                                                                                                                              |
|          | #8     | #7 AND ("humans"[MeSH Terms] OR "humans"[all fields]) = 129                                                                                                                                                                                                                                                                                                                                                                                                                                                                                                                                                                                                                                                                                                                                                                                                         |

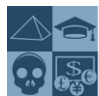

| Database       | Search | Query                                                                                                                                                                                                                                                                                                                                                                                                                                                                                                                                                                                                                                                                                                                                                                         |
|----------------|--------|-------------------------------------------------------------------------------------------------------------------------------------------------------------------------------------------------------------------------------------------------------------------------------------------------------------------------------------------------------------------------------------------------------------------------------------------------------------------------------------------------------------------------------------------------------------------------------------------------------------------------------------------------------------------------------------------------------------------------------------------------------------------------------|
| Scopus         | #1     | TITLE-ABS-KEY (Acculturation OR "Ethnic Groups" OR ethnicity OR immigrant* OR migrant* OR enculturation) = 347,855                                                                                                                                                                                                                                                                                                                                                                                                                                                                                                                                                                                                                                                            |
|                | #2     | TITLE-ABS-KEY ("Family Planning Services" OR "Maternal Health" OR "Maternal Health Services" OR "Postnatal Care" OR "Prenatal Care" OR "Reproductive Health" OR "Reproductive Health Services" OR "Sexual Health" OR "Parturition" OR "Pregnancy" OR births OR contraceptive behavior* OR fertility behavior* OR "intimate relationship" OR reproductive behavior*) = 121,790                                                                                                                                                                                                                                                                                                                                                                                                 |
|                | #3     | TITLE-ABS-KEY ("Reproductive Rights" OR "Disrespect and abuse in childbirth" OR "Mistreatment in childbirth" OR "Obstetric violence" OR "respectful maternity care") = 2,725                                                                                                                                                                                                                                                                                                                                                                                                                                                                                                                                                                                                  |
|                | #4     | TITLE-ABS-KEY (Abortion OR Contraception OR Infertility OR Pregnancy Behavior* OR Sexual Behavior* OR Sexual Dysfunction*) = 5,373                                                                                                                                                                                                                                                                                                                                                                                                                                                                                                                                                                                                                                            |
|                | #5     | TITLE-ABS-KEY ("systematic review" OR "systematic literature review" OR "systematic scoping review" OR "systematic narrative review" OR "systematic qualitative review" OR "systematic evidence review" OR "systematic quantitative review" OR "systematic meta-review" OR "systematic critical review" OR "systematic mixed studies review" OR "systematic mapping review" OR "systematic cochrane review" OR "systematic search and review" OR "systematic integrative review" OR "Cochrane Database Syst Rev") = 247,793                                                                                                                                                                                                                                                   |
|                | #6     | (#2 OR #3 OR #4) = 127,190                                                                                                                                                                                                                                                                                                                                                                                                                                                                                                                                                                                                                                                                                                                                                    |
|                | #7     | #1 AND #5 AND #6 = 102                                                                                                                                                                                                                                                                                                                                                                                                                                                                                                                                                                                                                                                                                                                                                        |
| Web Of Science | #1     | Acculturation [Mesh Major Topic] OR Acculturation OR Emigrants and Immigrants [Mesh Major Topic] OR Ethnic Groups [Mesh Major Topic] OR Undocumented Immigrants [Mesh Major Topic] OR enculturation OR ethnicity OR immigrant* OR migrant* = 199.138                                                                                                                                                                                                                                                                                                                                                                                                                                                                                                                          |
|                | #2     | Family Planning Services [Mesh Major Topic] OR Maternal Health [Mesh Major Topic] OR Maternal Health Services [Mesh Major Topic] OR Postnatal Care [Mesh Major Topic] OR Prenatal Care [Mesh Major Topic] OR Reproductive Health [Mesh Major Topic] OR Reproductive Health Services [Mesh Major Topic] OR Sexual Health [Mesh Major Topic] OR "Parturition" [Mesh Major Topic] OR "Pregnancy" [Mesh Major Topic] OR "Family Planning Services" OR "Maternal Health" OR "Maternal Health Services" OR "Postnatal Care" OR "Prenatal Care" OR "Reproductive Health" OR "Reproductive Health Services" OR "Sexual Health" OR Parturition OR Pregnancy OR births OR contraceptive behavior* OR fertility behavior* OR "intimate relationship" OR reproductive behavior* = 739.251 |
|                | #3     | Reproductive Rights [Mesh Major Topic] OR "Reproductive Rights" OR "Disrespect and abuse in childbirth" OR "Mistreatment in childbirth" OR "Obstetric violence" OR "respectful maternity care" = 1.213                                                                                                                                                                                                                                                                                                                                                                                                                                                                                                                                                                        |
|                | #4     | Abortion [Mesh Major Topic] OR Contraception [Mesh Major Topic] OR In-                                                                                                                                                                                                                                                                                                                                                                                                                                                                                                                                                                                                                                                                                                        |



|                                         |    |                                                                                                                                                                                                                                                                                                                                                                                                                                                                                                                                                                                          |
|-----------------------------------------|----|------------------------------------------------------------------------------------------------------------------------------------------------------------------------------------------------------------------------------------------------------------------------------------------------------------------------------------------------------------------------------------------------------------------------------------------------------------------------------------------------------------------------------------------------------------------------------------------|
|                                         |    | fertility [Mesh Major Topic] OR Pregnancy Behavior [Mesh Major Topic] OR Sexual Behavior [Mesh Major Topic] OR Sexual Dysfunctions, Psychological [Mesh Major Topic] OR Abortion OR Contraception OR Infertility OR Pregnancy Behavior* OR Sexual Behavior* OR Sexual Dysfunction* = 248.157                                                                                                                                                                                                                                                                                             |
|                                         | #5 | "systematic review" OR "systematic literature review" OR "systematic scoping review" OR "systematic narrative review" OR "systematic qualitative review" OR "systematic evidence review" OR "systematic quantitative review" OR "systematic meta-review" OR "systematic critical review" OR "systematic mixed studies review" OR "systematic mapping review" OR "systematic cochrane review" OR "systematic search and review" OR "systematic integrative review" OR "Cochrane Database Syst Rev" = 152.049                                                                              |
|                                         | #6 | (#2 OR #3 OR #4) = 898.920                                                                                                                                                                                                                                                                                                                                                                                                                                                                                                                                                               |
|                                         | #7 | #1 AND #5 AND #6 = 227                                                                                                                                                                                                                                                                                                                                                                                                                                                                                                                                                                   |
| Cochrane Database of Systematic Reviews | #1 | Acculturation OR Emigrants and Immigrants OR Ethnic Groups OR Undocumented Immigrants OR (Acculturation OR "Ethnic Groups" OR ethnicity OR immigrant* OR migrant* OR enculturation):ti,ab,kw = 8671                                                                                                                                                                                                                                                                                                                                                                                      |
|                                         | #2 | Family Planning Services OR Maternal Health OR Maternal Health Services OR Postnatal Care OR Prenatal Care OR Reproductive Health OR Reproductive Health Services OR Sexual Health OR "Parturition" OR "Pregnancy" OR ("Family Planning Services" OR "Maternal Health" OR "Maternal Health Services" OR "Postnatal Care" OR "Prenatal Care" OR "Reproductive Health" OR "Reproductive Health Services" OR "Sexual Health" OR Parturition OR Pregnancy OR births OR contraceptive behavior* OR fertility behavior* OR "intimate relationship" OR reproductive behavior*):ti,ab,kw = 66298 |
|                                         | #3 | Reproductive Rights OR ("Reproductive Rights" OR "Disrespect and abuse in childbirth" OR "Mistreatment in childbirth" OR "Obstetric violence" OR "respectful maternity care"):ti,ab,kw = 337                                                                                                                                                                                                                                                                                                                                                                                             |
|                                         | #4 | Abortion OR Contraception OR Infertility OR Pregnancy Behavior OR Sexual Behavior OR Sexual Dysfunctions, Psychological OR (Abortion OR Contraception OR Infertility OR Pregnancy Behavior* OR Sexual Behavior* OR Sexual Dysfunction*):ti,ab,kw = 31527                                                                                                                                                                                                                                                                                                                                 |
|                                         | #5 | "systematic review" OR "systematic literature review" OR "systematic scoping review" OR "systematic narrative review" OR "systematic qualitative review" OR "systematic evidence review" OR "systematic quantitative review" OR "systematic meta-review" OR "systematic critical review" OR "systematic mixed studies review" OR "systematic mapping review" OR "systematic cochrane review" OR "systematic search and review" OR "systematic integrative review" OR "Cochrane Database Syst Rev" = 20215                                                                                |
|                                         | #6 | (#2 OR #3 OR #4) = 78347                                                                                                                                                                                                                                                                                                                                                                                                                                                                                                                                                                 |
|                                         | #7 | #1 AND #5 AND #6 = 328                                                                                                                                                                                                                                                                                                                                                                                                                                                                                                                                                                   |
|                                         | #8 | Cochrane Reviews = 275 (NOT "Cochrane Protocols" AND "Trials")                                                                                                                                                                                                                                                                                                                                                                                                                                                                                                                           |
