# Supplementary material
Source: MDPI journal article supplement (https://www.mdpi.com/2076-0760/10/2/63)
Supplement: s1 [file s1]

**Table S3. Reasons for exclusion of full-text articles.**

Detailed below are full references for the excluded articles, with reasons for exclusion.

**The paper is not focused on migrant populations**

Blumberg J, Ballares V, Durbin JL. Ethnic variations on gestational diabetes mellitus and evidence-based first-line interventions. *J Matern Fetal Neonatal Med.* 2018;31(19):2641-2647. doi:10.1080/14767058.2017.1344967

Evagorou O, Arvaniti A, Samakouri M. Cross-Cultural Approach of Postpartum Depression: Manifestation, Practices Applied, Risk Factors and Therapeutic Interventions. *Psychiatr Q.* 2016;87(1):129-154. doi:10.1007/s11126-015-9367-1

Fish J, Papaloukas P, Jaspal R, Williamson I. Equality in sexual health promotion: a systematic review of effective interventions for black and minority ethnic men who have sex with men. *BMC Public Health.* 2016 Aug;16(1):810. DOI: 10.1186/s12889-016-3418-x.

Godino L, Turchetti D, Skirton H. A systematic review of factors influencing uptake of invasive fetal genetic testing by pregnant women of advanced maternal age. *Midwifery.* 2013;29(11):1235-1243. doi:10.1016/j.midw.2012.11.009

Huang Y, Shallcross D, Pi L, Tian F, Pan J, Ronsmans C. Ethnicity and maternal and child health outcomes and service coverage in western China: a systematic review and meta-analysis. *Lancet Glob Health.* 2018;6(1):e39-e56. doi:10.1016/S2214-109X(17)30445-X

Maulsby C, Millett G, Lindsey K, et al. A systematic review of HIV interventions for black men who have sex with men (MSM). *BMC Public Health.* 2013;13:625. Published 2013 Jul 2. doi:10.1186/1471-2458-13-625

Oliveira, Kelly Albuquerque de, Araújo, Edna Maria de, Oliveira, Keyte Albuquerque de, Casotti, Cesar Augusto, Silva, Carlos Alberto Lima da, & Santos, Djanilson Barbosa dos. (2018). Association between race/skin color and premature birth: a systematic review with meta-analysis. *Revista de Saúde Pública*, 52, 26. Epub 09 de abril de 2018. <https://doi.org/10.11606/s1518-8787.2018052000406>

Rowe RE, Garcia J. Social class, ethnicity and attendance for antenatal care in the United Kingdom: a systematic review. *J Public Health Med.* 2003;25(2):113-119. doi:10.1093/pubmed/fdg025

Rowe RE, Garcia J, Davidson LL. Social and ethnic inequalities in the offer and uptake of prenatal screening and diagnosis in the UK: a systematic review. *Public Health.* 2004;118(3):177-189. doi:10.1016/j.puhe.2003.08.004

Sadovsky ADI, Mascarello KC, Miranda AE, Silveira MF. The associations that income, education, and ethnicity have with birthweight and prematurity: how close are they? *Rev Panam Salud Publica.* 2018;42:e92. <https://doi.org/10.26633/RPSP.2018.92>

Smith SA. Sexual and reproductive health of micronesians: a systematic review of the literature. *Asia Pac J Public Health.* 2013;25(1):7-18. doi:10.1177/1010539512458951

Walsh T, Bertozzi-Villa C, Schneider JA. Systematic review of racial disparities in human papillomavirus-associated anal dysplasia and anal cancer among men who have sex with men. *Am J Public Health.* 2015;105(4):e34-e45. doi:10.2105/AJPH.2014.302469

Wellons, M. F., Fujimoto, V. Y., Baker, V. L., Barrington, D. S., Broomfield, D., Catherino, W. H., Richard-Davis, G., Ryan, M., Thornton, K., & Armstrong, A. Y. (2012). Race matters: a systematic review of racial/ethnic disparity in Society for Assisted Reproductive Technology reported outcomes. *Fertility and sterility*, 98(2), 406–409. <https://doi.org/10.1016/j.fertnstert.2012.05.012>

Williams, M. V., Palar, K., & Derose, K. P. (2011). Congregation-based programs to address HIV/AIDS: elements of successful implementation. *Journal of urban health : bulletin of the New York Academy of Medicine*, 88(3), 517–532. <https://doi.org/10.1007/s11524-010-9526-5>

### **The paper does not focus on SRH outcomes**

Dalla Zuanna T, Spadea T, Milana M, et al. Avoidable hospitalization among migrants and ethnic minority groups: a systematic review. *Eur J Public Health*. 2017;27(5):861-868. doi:10.1093/eurpub/ckx113

De Maio, F.G. Immigration as pathogenic: a systematic review of the health of immigrants to Canada. *Int J Equity Health* 9, 27 (2010). <https://doi.org/10.1186/1475-9276-9-27>

Fellmeth G, Fazel M, Plugge E. Migration and perinatal mental health in women from low- and middle-income countries: a systematic review and meta-analysis. *BJOG*. 2017;124(5):742-752. doi:10.1111/1471-0528.14184

Ferrer, H.B., Trotter, C., Hickman, M. et al. Barriers and facilitators to HPV vaccination of young women in high-income countries: a qualitative systematic review and evidence synthesis. *BMC Public Health* 14, 700 (2014). <https://doi.org/10.1186/1471-2458-14-700>

Gagnon AJ, Redden KL. Reproductive health research of women migrants to Western countries: A systematic review for refining the clinical lens. *Best Pract Res Clin Obstet Gynaecol*. 2016;32:3-14. doi:10.1016/j.bpobgyn.2016.01.005

Jones EJ, Hernandez TL, Edmonds JK, Ferranti EP. Continued Disparities in Postpartum Follow-Up and Screening Among Women With Gestational Diabetes and Hypertensive Disorders of Pregnancy: A Systematic Review. *J Perinat Neonatal Nurs*. 2019;33(2):136-148. doi:10.1097/JPN.0000000000000399

Kim C, Berger DK, Chamany S. Recurrence of gestational diabetes mellitus: a systematic review. *Diabetes Care*. 2007;30(5):1314-1319. doi:10.2337/dc06-2517

Schaaf JM, Liem SM, Mol BW, Abu-Hanna A, Ravelli AC. Ethnic and racial disparities in the risk of preterm birth: a systematic review and meta-analysis. *Am J Perinatol*. 2013;30(6):433-450. doi:10.1055/s-0032-1326988

Washio, Y., & Cassey, H. (2016). Systematic Review of Interventions for Racial/Ethnic-Minority Pregnant Smokers. *Journal of smoking cessation*, 11(1), 12–27. <https://doi.org/10.1017/jsc.2014.12>

### **The paper is not a systematic review (in accordance with the DARE criteria)**

Creanga AA, Bateman BT, Kuklina EV, Callaghan WM. Racial and ethnic disparities in severe maternal morbidity: a multistate analysis, 2008-2010. *Am J Obstet Gynecol*. 2014;210(5):435.e1-435.e4358. doi:10.1016/j.ajog.2013.11.039

Jones, K. M., Power, M. L., Queenan, J. T., & Schulkin, J. (2015). Racial and ethnic disparities in breastfeeding. *Breastfeeding medicine : the official journal of the Academy of Breastfeeding Medicine*, 10(4), 186–196. <https://doi.org/10.1089/bfm.2014.0152>

Lewis NM, Wilson K. HIV risk behaviours among immigrant and ethnic minority gay and bisexual men in North America and Europe: A systematic review. *Soc Sci Med*. 2017;179:115-128. doi:10.1016/j.socscimed.2017.02.033

Ruwe M, Capitman J, Bengiamin M, Soto T. A systematic review and meta-analysis of racial disparities in prenatal care in California: How much? Does insurance matter?. *Soc Work Public Health*. 2010;25(6):550-571. doi:10.1080/19371910903344217

### **The paper is not a systematic review of primary studies (umbrella review)**

Heslehurst, N., Brown, H., Pemu, A. et al. Perinatal health outcomes and care among asylum seekers and refugees: a systematic review of systematic reviews. *BMC Med* 16, 89 (2018). <https://doi.org/10.1186/s12916-018-1064-0>
