# Supplementary material
Source: MDPI journal article supplement (https://www.mdpi.com/2076-0760/10/2/63)
Supplement: s1 [file s1]

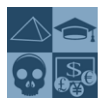

Table S6. AMSTAR 2 rating for all included studies.

| Author,<br>Date             | 1. Did the research questions and inclusion criteria for the review include the components of PICO? | 2. Did the report of the review contain an explicit statement that the review methods were established prior to conduct of the review and did the report justify any significant deviations from the protocol? | 3. Did the review authors explain in their selection of the study designs for inclusion in the review? | 4. Did the review authors use a comprehensive literature search strategy? | 5. Did the review authors perform data extraction in duplicate? | 6. Did the review authors perform data extraction in duplicate? | 7. Did the review authors provide a list of excluded studies and justify the exclusions? | 8. Did the review authors describe the included studies in adequate detail? | 9. Did the review authors use a satisfactory technique for assessing the risk of bias in individual studies that were included in the review? | 10. Did the review authors report on the sources of funding for the included studies? | 11. If meta-analysis was performed, did the review authors use appropriate methods for combination of results? | 12. If meta-analysis was performed, did the review authors assess the potential impact of risk of bias in individual studies on the results of the meta-analysis of other evidence synthesis? | 13. Did the review authors account for risk of bias in individual studies when interpreting/discussing the results of the review? | 14. Did the review authors provide a satisfactory explanation for, and discussion of, any heterogeneity observed in the results of the review? | 15. If they performed quantitative synthesis, did the review authors carry out an adequate investigation of publication bias (small study bias) and discuss its likely impact on the results of the review? | 16. Did the review authors report any potential sources of conflict of interest, including any funding they received for conducting the review? | Overall confidence in the results of the review |
|-----------------------------|-----------------------------------------------------------------------------------------------------|----------------------------------------------------------------------------------------------------------------------------------------------------------------------------------------------------------------|--------------------------------------------------------------------------------------------------------|---------------------------------------------------------------------------|-----------------------------------------------------------------|-----------------------------------------------------------------|------------------------------------------------------------------------------------------|-----------------------------------------------------------------------------|-----------------------------------------------------------------------------------------------------------------------------------------------|---------------------------------------------------------------------------------------|----------------------------------------------------------------------------------------------------------------|-----------------------------------------------------------------------------------------------------------------------------------------------------------------------------------------------|-----------------------------------------------------------------------------------------------------------------------------------|------------------------------------------------------------------------------------------------------------------------------------------------|-------------------------------------------------------------------------------------------------------------------------------------------------------------------------------------------------------------|-------------------------------------------------------------------------------------------------------------------------------------------------|-------------------------------------------------|
| Alhasanat & Giurgescu, 2017 | Yes                                                                                                 | No                                                                                                                                                                                                             | No                                                                                                     | Partial yes                                                               | No                                                              | No                                                              | No                                                                                       | Yes                                                                         | Not applicable                                                                                                                                | No                                                                                    | No meta-analysis                                                                                               | No meta-analysis                                                                                                                                                                              | Yes                                                                                                                               | Yes                                                                                                                                            | No meta-analysis                                                                                                                                                                                            | Yes                                                                                                                                             | Low                                             |
| Almeida et                  | Yes                                                                                                 | No                                                                                                                                                                                                             | No                                                                                                     | Yes                                                                       | No                                                              | Yes                                                             | No                                                                                       | Yes                                                                         | Not                                                                                                                                           | No                                                                                    | No                                                                                                             | No                                                                                                                                                                                            | No                                                                                                                                | Yes                                                                                                                                            | No                                                                                                                                                                                                          | Yes                                                                                                                                             | Moderate                                        |

|                                |     |             |     |             |     |     |             |             |                |    |                  |                  |     |     |                  |     |          |
|--------------------------------|-----|-------------|-----|-------------|-----|-----|-------------|-------------|----------------|----|------------------|------------------|-----|-----|------------------|-----|----------|
| al., 2013                      |     |             |     |             |     |     |             |             | applicable     |    | meta-analysis    | meta-analysis    |     |     | meta-analysis    |     |          |
| Alvarez-de l Arco et al., 2013 | Yes | No          | No  | No          | Yes | No  | Partial yes | Partial yes | Not applicable | No | No meta-analysis | No meta-analysis | No  | Yes | No meta-analysis | Yes | Moderate |
| Anderson et al., 2017          | Yes | Yes         | Yes | Yes         | Yes | No  | No          | Yes         | Yes            | No | Yes              | Yes              | Yes | Yes | Yes              | Yes | High     |
| Balaam et al., 2013            | Yes | No          | Yes | Yes         | Yes | Yes | No          | Yes         | Not applicable | No | No meta-analysis | No meta-analysis | No  | No  | No meta-analysis | Yes | Moderate |
| Blondell et al., 2015          | Yes | No          | Yes | Yes         | Yes | Yes | No          | Yes         | No             | No | No meta-analysis | No meta-analysis | No  | No  | No meta-analysis | No  | Moderate |
| Bollini et al., 2009           | Yes | No          | Yes | Yes         | No  | Yes | Yes         | Yes         | Not applicable | No | No meta-analysis | No meta-analysis | No  | Yes | No meta-analysis | Yes | High     |
| de Jong et al., 2017           | Yes | No          | No  | Yes         | Yes | No  | No          | No          | Not applicable | No | No meta-analysis | No meta-analysis | Yes | Yes | No meta-analysis | Yes | Low      |
| Denize et al., 2018            | Yes | Yes         | Yes | Yes         | Yes | Yes | No          | Yes         | Yes            | No | Yes              | Yes              | Yes | Yes | Yes              | Yes | High     |
| Du & Li, 2015                  | Yes | No          | No  | Yes         | No  | No  | No          | Yes         | Yes            | No | Yes              | Yes              | Yes | Yes | Yes              | Yes | Moderate |
| Dzomba et al., 2019            | Yes | No          | Yes | Yes         | Yes | No  | No          | Yes         | Yes            | No | Yes              | Yes              | Yes | Yes | Yes              | Yes | Moderate |
| Fakoya et al., 2015            | Yes | Yes         | Yes | Yes         | No  | No  | No          | Yes         | Yes            | No | No meta-analysis | No meta-analysis | Yes | Yes | No meta-analysis | Yes | Moderate |
| Frances Barnes et al., 2013    | Yes | Partial yes | Yes | Partial yes | Yes | Yes | Partial yes | No          | No             | No | No meta-analysis | No meta-analysis | No  | No  | No meta-analysis | Yes | Low      |
| Gagnon et al., 2009            | Yes | No          | Yes | Yes         | No  | No  | No          | Yes         | No             | No | Yes              | No               | No  | Yes | No               | Yes | Moderate |
| Ghimire et al., 2019           | Yes | Yes         | Yes | Yes         | Yes | Yes | No          | Partial yes | Yes            | No | No meta-analysis | No meta-analysis | Yes | Yes | No meta-analysis | Yes | Moderate |
| Gissler et al., 2009           | Yes | Yes         | Yes | Yes         | Yes | Yes | Yes         | Yes         | Yes            | No | No meta-analysis | No meta-analysis | No  | Yes | No meta-analysis | Yes | Moderate |
| Heaman et                      | Yes | No          | No  | Yes         | Yes | Yes | No          | Yes         | No             | No | Yes              | No               | No  | Yes | No               | Yes | Moderate |

|                                   |     |     |     |     |     |     |                 |     |                   |    |                     |                         |     |     |                         |     |          |  |
|-----------------------------------|-----|-----|-----|-----|-----|-----|-----------------|-----|-------------------|----|---------------------|-------------------------|-----|-----|-------------------------|-----|----------|--|
| al., 2013                         |     |     |     |     |     |     |                 |     |                   |    |                     |                         |     |     |                         |     |          |  |
| Higginbott<br>om et al.,<br>2015  | Yes | No  | Yes | Yes | Yes | Yes | No              | Yes | Not<br>applicable | No | No<br>meta-analysis | No<br>meta-anal<br>ysis | No  | Yes | No<br>meta-an<br>alysis | Yes | Moderate |  |
| Ivanova et<br>al., 2018           | Yes | No  | No  | Yes | No  | Yes | No              | Yes | Yes               | No | No<br>meta-analysis | No<br>meta-anal<br>ysis | Yes | Yes | No<br>meta-an<br>alysis | Yes | Moderate |  |
| Kim et al.,<br>2017               | Yes | No  | Yes | Yes | Yes | No  | No              | Yes | Yes               | No | Yes                 | Yes                     | Yes | Yes | No<br>meta-an<br>alysis | Yes | Moderate |  |
| Mengesha<br>et al., 2016          | No  | No  | Yes | Yes | No  | Yes | No              | Yes | Partial yes       | No | No<br>meta-analysis | No<br>meta-anal<br>ysis | Yes | No  | No<br>meta-an<br>alysis | Yes | Moderate |  |
| Merry et<br>al., 2013             | Yes | No  | Yes | Yes | No  | No  | No              | Yes | Yes               | No | Yes                 | Yes                     | Yes | Yes | Yes                     | Yes | Moderate |  |
| Michalopo<br>ulos et al.,<br>2016 | Yes | No  | No  | Yes | No  | Yes | No              | Yes | No                | No | No<br>meta-analysis | No<br>meta-anal<br>ysis | Yes | Yes | No<br>meta-an<br>alysis | No  | Moderate |  |
| Mukherjee<br>et al., 2016         | Yes | Yes | Yes | Yes | Yes | Yes | No              | Yes | Not<br>applicable | No | No<br>meta-analysis | No<br>meta-anal<br>ysis | Yes | Yes | No<br>meta-an<br>alysis | Yes | Moderate |  |
| Nilaweera<br>et al., 2014         | Yes | No  | No  | Yes | No  | No  | No              | Yes | Not<br>applicable | No | No<br>meta-analysis | No<br>meta-anal<br>ysis | No  | Yes | No<br>meta-an<br>alysis | Yes | Moderate |  |
| Platt et al.,<br>2013             | Yes | Yes | Yes | Yes | Yes | Yes | Partia<br>l yes | Yes | Partial yes       | No | No<br>meta-analysis | No<br>meta-anal<br>ysis | Yes | Yes | No<br>meta-an<br>alysis | Yes | Moderate |  |
| Rade et al.,<br>2018              | Yes | Yes | Yes | Yes | Yes | Yes | Partia<br>l yes | Yes | Partial yes       | No | No<br>meta-analysis | No<br>meta-anal<br>ysis | Yes | No  | No<br>meta-an<br>alysis | Yes | Low      |  |
| Scamell &<br>Ghumman,<br>2019     | Yes | Yes | Yes | Yes | yes | Yes | No              | Yes | No                | No | No<br>meta-analysis | No<br>meta-anal<br>ysis | No  | No  | No<br>meta-an<br>alysis | No  | Low      |  |
| Small et al.,<br>2014             | Yes | No  | No  | Yes | Yes | Yes | Yes             | Yes | Not<br>applicable | No | No<br>meta-analysis | No<br>meta-anal<br>ysis | No  | Yes | No<br>meta-an<br>alysis | Yes | High     |  |
| Turkmani<br>et al., 2019          | Yes | No  | No  | Yes | Yes | Yes | Yes             | Yes | Not<br>applicable | No | No<br>meta-analysis | No<br>meta-anal<br>ysis | No  | Yes | No<br>meta-an<br>alysis | Yes | High     |  |

|                                |     |     |     |             |     |     |             |             |                |    |                  |                  |     |     |                  |     |          |
|--------------------------------|-----|-----|-----|-------------|-----|-----|-------------|-------------|----------------|----|------------------|------------------|-----|-----|------------------|-----|----------|
| Urquia et al., 2010            | Yes | No  | No  | Yes         | No  | No  | No          | Yes         | No             | No | Yes              | No               | No  | Yes | No               | Yes | Low      |
| Villalonga-Olives et al., 2017 | Yes | No  | No  | Partial yes | No  | No  | No          | Yes         | Not applicable | No | No meta-analysis | No meta-analysis | No  | Yes | No meta-analysis | Yes | Low      |
| Weine & Kashuba, 2012          | Yes | No  | No  | Yes         | No  | No  | No          | Yes         | Not applicable | No | No meta-analysis | No meta-analysis | No  | Yes | No meta-analysis | Yes | Moderate |
| Winn et al., 2017              | Yes | Yes | Yes | Yes         | Yes | Yes | Partial yes | No          | No             | No | No meta-analysis | No meta-analysis | Yes | No  | No meta-analysis | No  | Low      |
| Yu, 2010                       | Yes | Yes | Yes | Yes         | Yes | Yes | Partial yes | Partial yes | Partial yes    | No | No meta-analysis | No meta-analysis | Yes | Yes | No meta-analysis | No  | Low      |

**Key**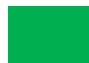

yes

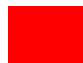

no

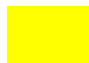

not applicable
