# Supplementary material
Source: MDPI journal article supplement (https://www.mdpi.com/2076-0760/10/2/63)
Supplement: s1 [file s1]

Archive with 6 entries (6 files):
- Femina USLR - Table S1.pdf
- Femina USLR - Table S2.pdf
- Femina USLR - Table S3.pdf
- Femina USLR - Table S4.pdf
- Femina USLR - Table S5.pdf
- Femina USLR - Table S6.pdf
